# Supplementary material
Source: publisher site journal article supplement (http://www.degruyter.com/publication/journal_key/NPF/downloadAsset/NPF_NPF%20Call%20for%20papers_Special%20Issue_Climate%20change.pdf)
Supplement: Supplementary file 1 [file NPF_NPF%20Call%20for%20papers_Special%20Issue_Climate%20change.pdf]

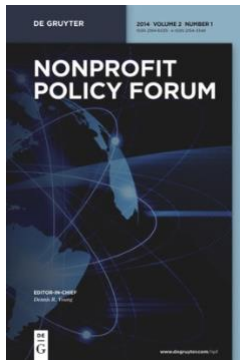

*Nonprofit Policy Forum* invites papers for a special issue on  
**Nonprofits, Public Policy, and Climate Change.**

The consequences and implications of climate change cannot be overstated. From the potential devastation of entire cities and nations due to sea level rise and natural disasters, to the eradication of species resulting from ocean and surface temperature increases, to the health impacts of pollution, food scarcity, and diseases, climate change touches virtually every aspect of society. As part of our societal ecosystem, nonprofits and other civil society actors participate in and are affected by climate change in myriad ways. As examples, nonprofits advocate for and against public policy change at local, national, and international levels; participate in policymaking and governance collaborations; and work with communities to implement adaptation and disaster response initiatives.

Building on other recent calls for an enhanced agenda to understand and support the role of nonprofits in addressing and responding to climate change, this special issue explores the relationship between nonprofits (or other civil society actors), public policy, and climate change. Questions to be addressed in this special issue may include, but are not limited to, the following:

- What roles do nonprofits or other civil society actors play in policymaking or governance schemes related to climate change? For example, what is the role of nonprofits in advocating directly to policymakers or engaging voters and others to be active in supporting or opposing climate change initiatives? How does the role of civil society vary around the world, or what are the global dimensions of climate governance?
- Is there a way to disentangle 'meaningful' climate change actions from 'symbolic' ones? How can we measure the effectiveness of climate change work by nonprofits or in related corporate responsibility efforts?
- What is the role of foundations in funding initiatives that support or oppose climate change? And how do foundation and other funding priorities affect the ability of nonprofits to respond and adapt to climate change?
- How do policies governing the nonprofit sector affect organizations' abilities to respond and adapt to climate change?
- How do nonprofits working in the climate change sphere balance advocacy and service delivery?
- What are the climate justice implications of nonprofits' advocacy, governance, or implementation activities?
- As nonprofits engage in policy advocacy, what is the relationship between strategy and context? What strategies might work in particularly challenging or intractable political contexts?
- What is the impact of climate change on nonprofits themselves?

The special issue will be comprised primarily of research articles, and may include one or more research note, policy brief, commentary, case study, interview, or book review. Instructions for submissions are available on the *NPF* website: <https://www.degruyter.com/journal/key/npf/html?lang=en>

Timeline:

- 9/30/22: Optional deadline to submit 500-1,000 word abstracts to the guest editors for initial feedback.
- 3/10/23: Deadline for full papers (prior abstract submission not required) to be submitted for peer review via NPF'S online submission portal. Please indicate that your submission is intended for the Climate Change SI.

Please contact the guest editors with any questions:

Jennifer A. Kagan, University of Hawai'i at Mānoa, [jkagan@hawaii.edu](mailto:jkagan@hawaii.edu)

Patricia Bromley, Stanford University, [pbromley@stanford.edu](mailto:pbromley@stanford.edu)
